# Supplementary material for: The effect of oleic acid on the synthesis of Fe3−xO4 nanoparticles over a wide size range
Source: Royal Society of Chemistry journal article supplement (doi:10.1039/c5cp03395k), 2015-01-01
Supplement: c5cp03395k1.pdf [file c5cp03395k1.pdf]

## Supporting Information

### The role of the oleic acid on the synthesis of $\text{Fe}_{3-x}\text{O}_4$ nanoparticles over a wide size range

*Carlos Moya,\* Xavier Batlle and Amilcar Labarta*

Departament de Física Fonamental, Institut de Nanociència i Nanotecnologia,  
Universitat de Barcelona, Martí i Franquès 1, Barcelona 08028, Catalonia, Spain

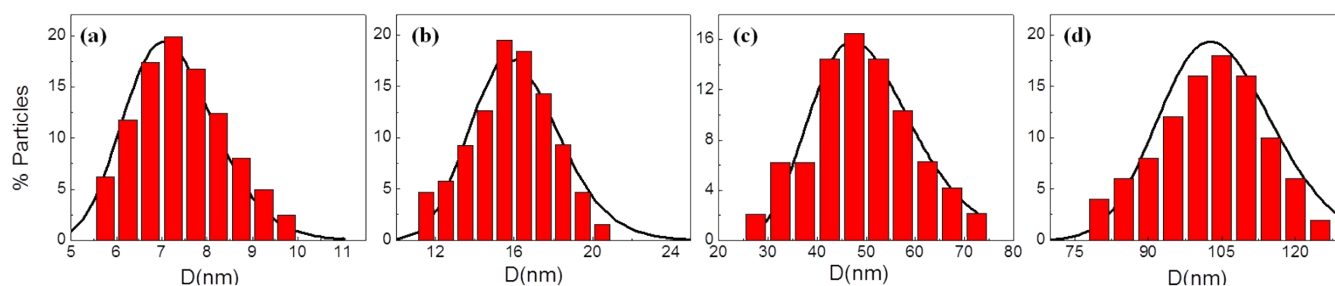

**Figure S1.** Histograms for the particle size of samples: (a) R1, (b) R2, (c) R3 and (d) R4.

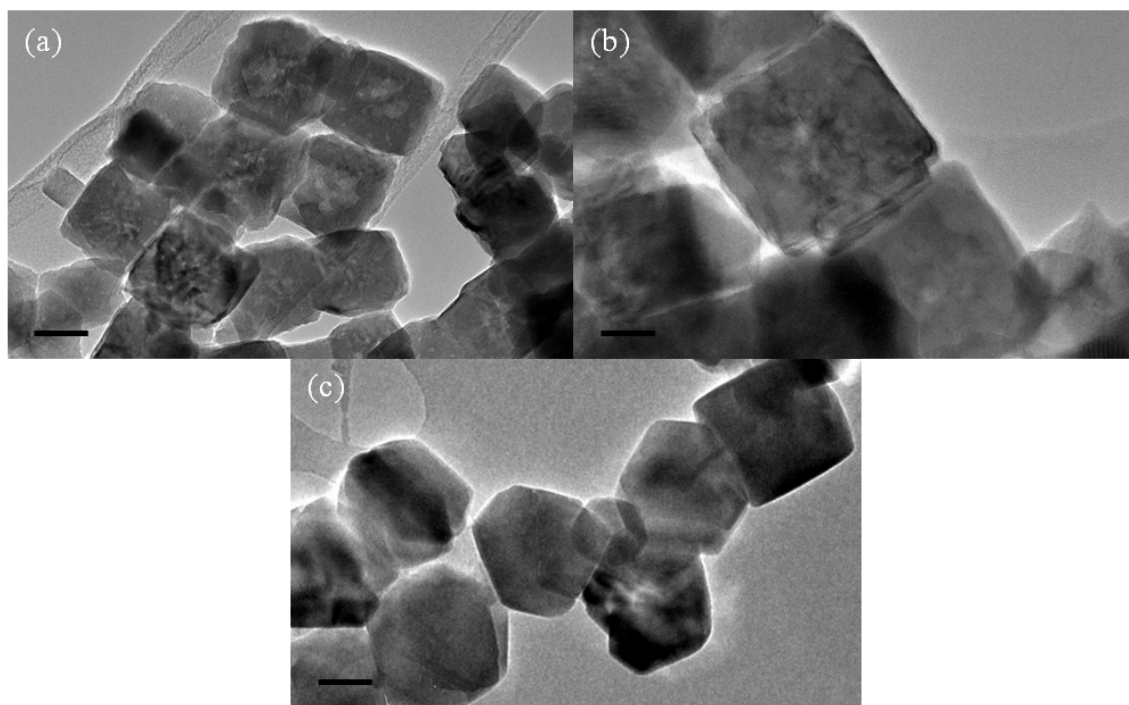

**Figure S2.** HRTEM images for samples with bigger NPs. (a) and (b) correspond to R3. (c) R4. Scale bars: (a) 30 nm, (b) 15 nm, (c) 50 nm.

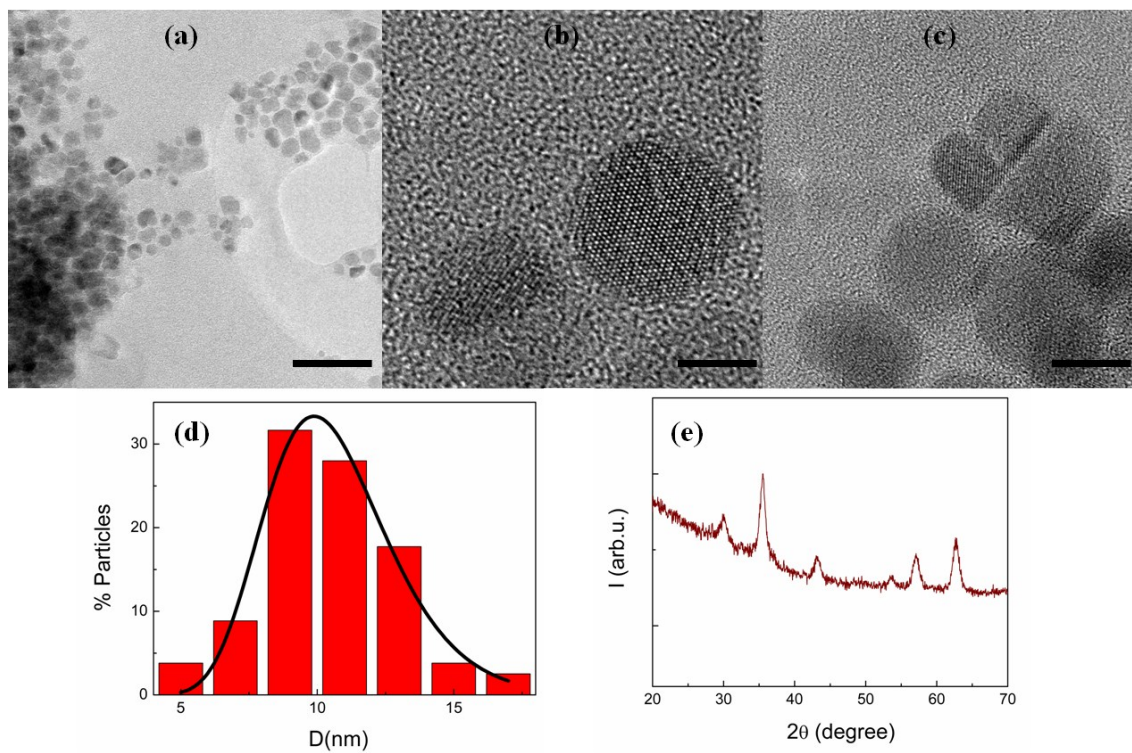

**Figure S3.** Structural characterization of sample R5. (a) TEM image at low resolution, (b) and (c) HRTEM images. Scale bars: (a) 50 nm, (b) 5 nm and (c) 7nm. (d) Particle-size distribution. (e) XRD spectrum of the sample.

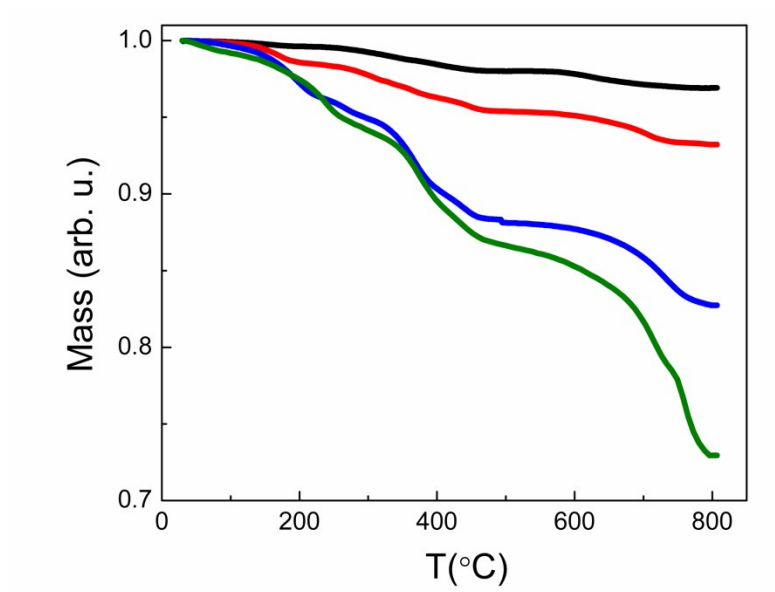

**Figure S4.** Thermogravimetric curves for the samples as follows: R1 (green solid line), R2 (blue solid line), R3 (red solid line) and R4 (black solid line).

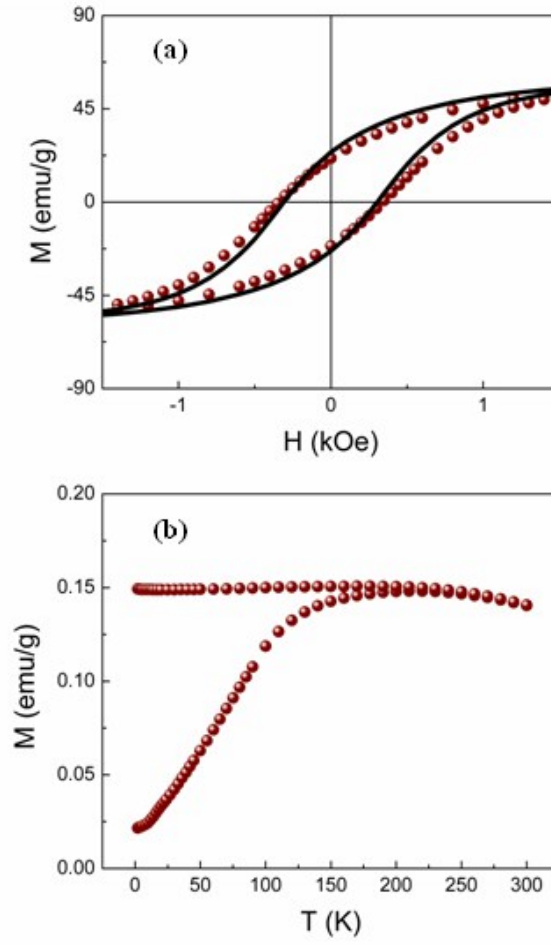

**Figure S5.** Magnetic characterization of the sample R5. (a) Hysteresis loop at 5 K (brown spheres) and after FC at 10 kOe (black solid line). (b)  $M_{ZFC} - M_{FC}$  curves for the same sample.

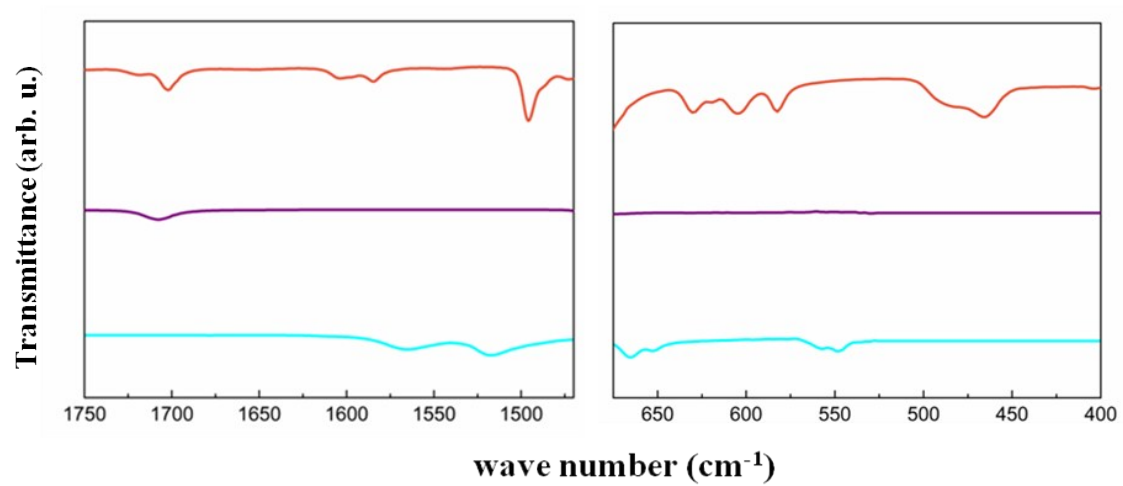

**Figure S6.** IR spectra of the reactants: Fe(acac)<sub>3</sub> (turquoise solid line), oleic acid (purple solid line) and benzyl-ether (red solid line).

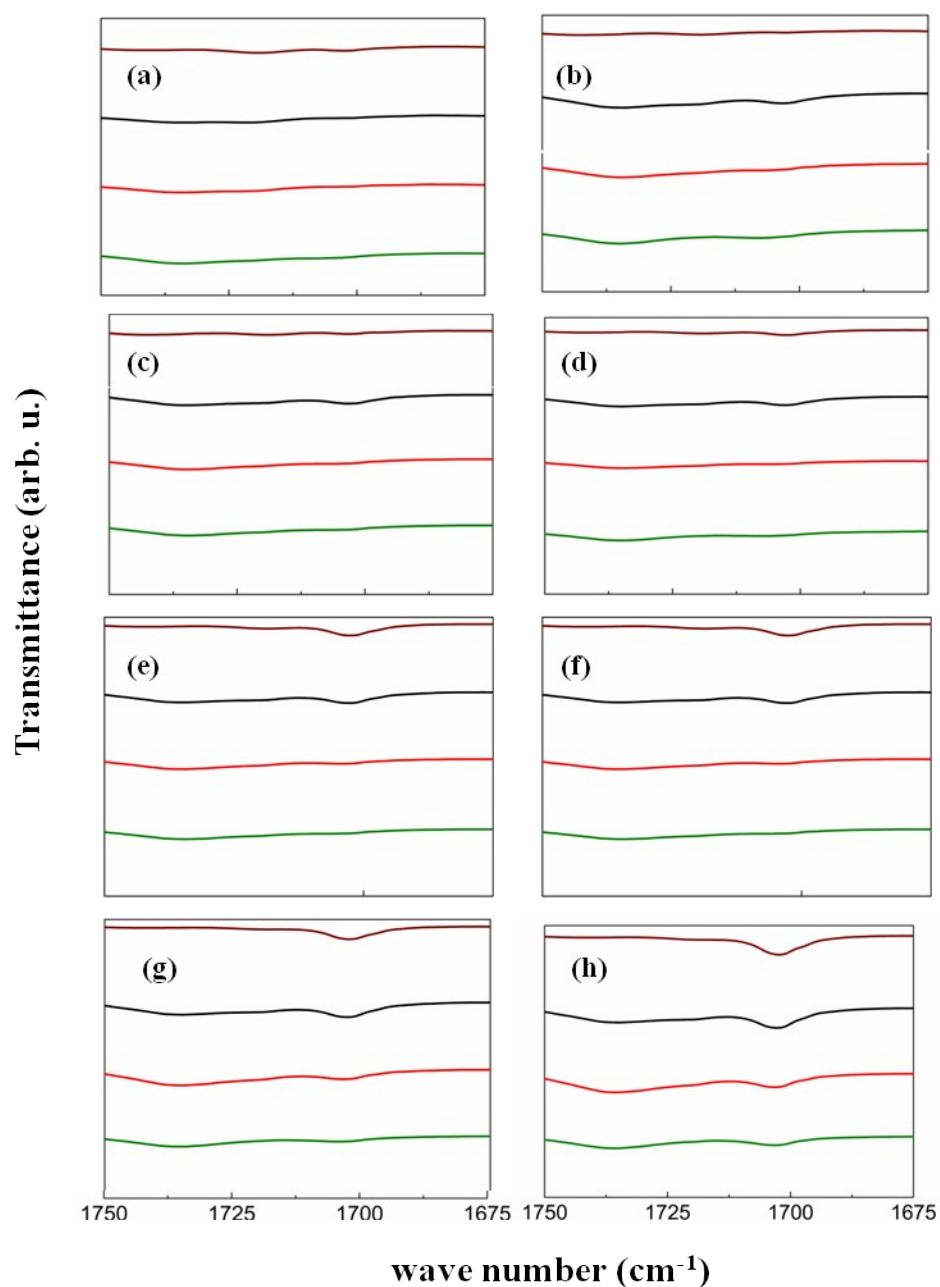

**Figure S7.** IR spectra for the reaction mixtures in the wave number range between 1750 and 1675  $\text{cm}^{-1}$  at (a) 200 °C, (b) 210 °C, (c) 220 °C (d) 230 °C, (e) 240 °C, (f) 250 °C, (g) 260 °C and (h) 270 °C. Curves are as follows: R1 (solid green line), R2 (solid red line), R4 (solid black line) and R5 (solid brown line).

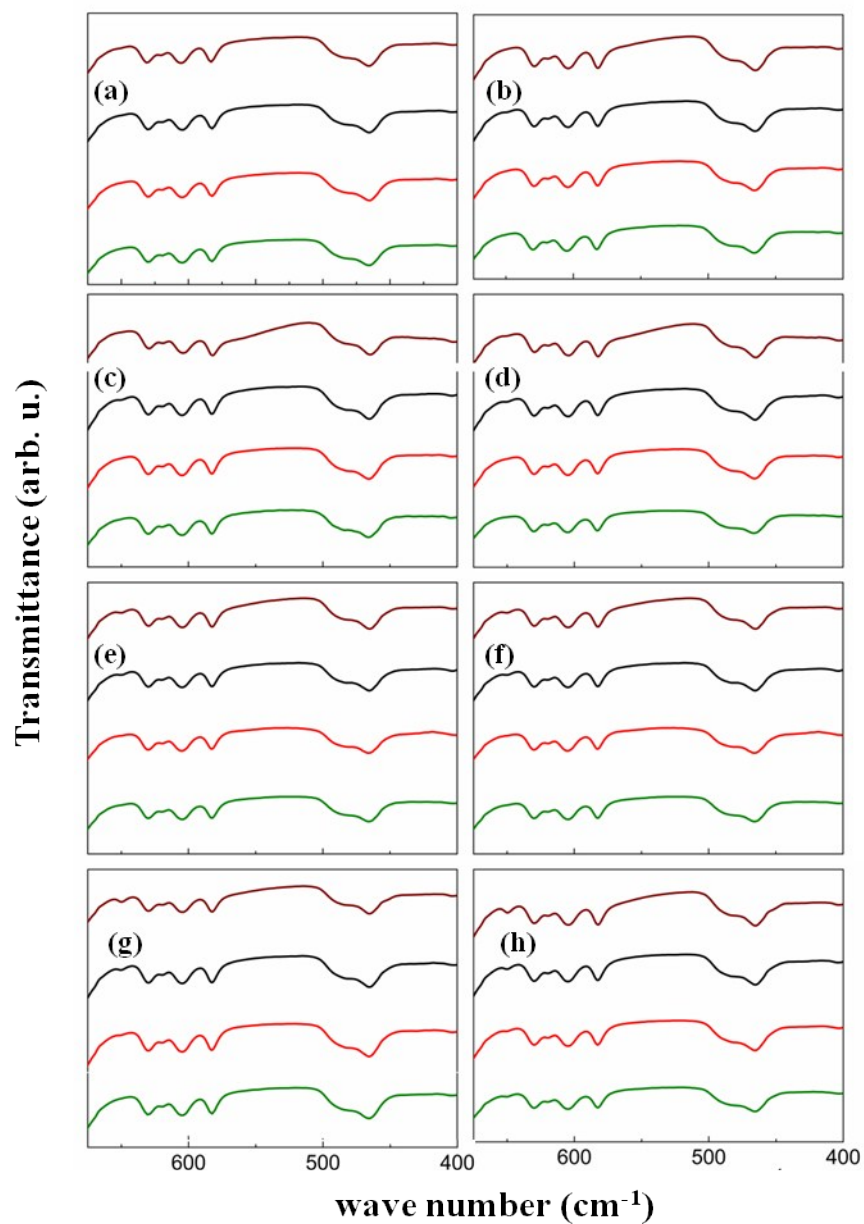

**Figure S8.** IR spectra for the reaction mixtures in the wave number range between 675 and 400 cm<sup>-1</sup> at (a) 200 °C, (b) 210 °C, (c) 220 °C (d) 230 °C, (e) 240 °C, (f) 250 °C, (g) 260 °C and (h) 270 °C. Curves are as follows: R1 (solid green line), R2 (solid red line), R4 (solid black line) and R5 (solid brown line).
